# Supplementary material for: Intron Editing Reveals SNORD-Dependent Maturation of the Small Nucleolar RNA Host Gene GAS5 in Human Cells
Source: MDPI journal article supplement (doi:10.3390/ijms242417621), 2023-12-18
Supplement: s1 [file s1]

## Supplementary Materials

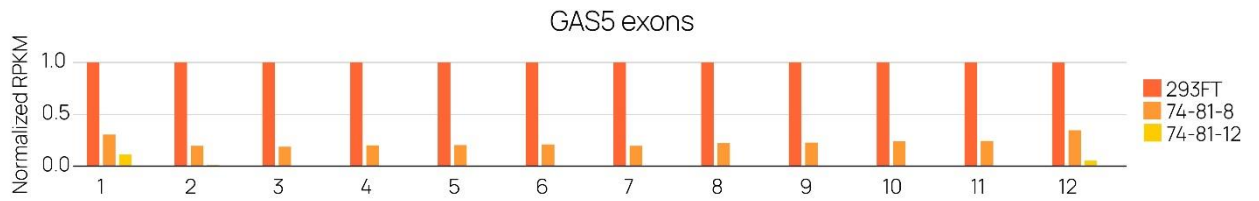

**Supplementary Figure S1.** The analysis of GAS5 lncRNA expression in modified cell lines exon by exon from the RNA-Seq data on polyA fraction of the transcriptome. The relative decrease in the amount of all twelve exons is present in case of both 74-81 cell lines. Data is presented as RPKMs normalized to the control 293FT cell line.

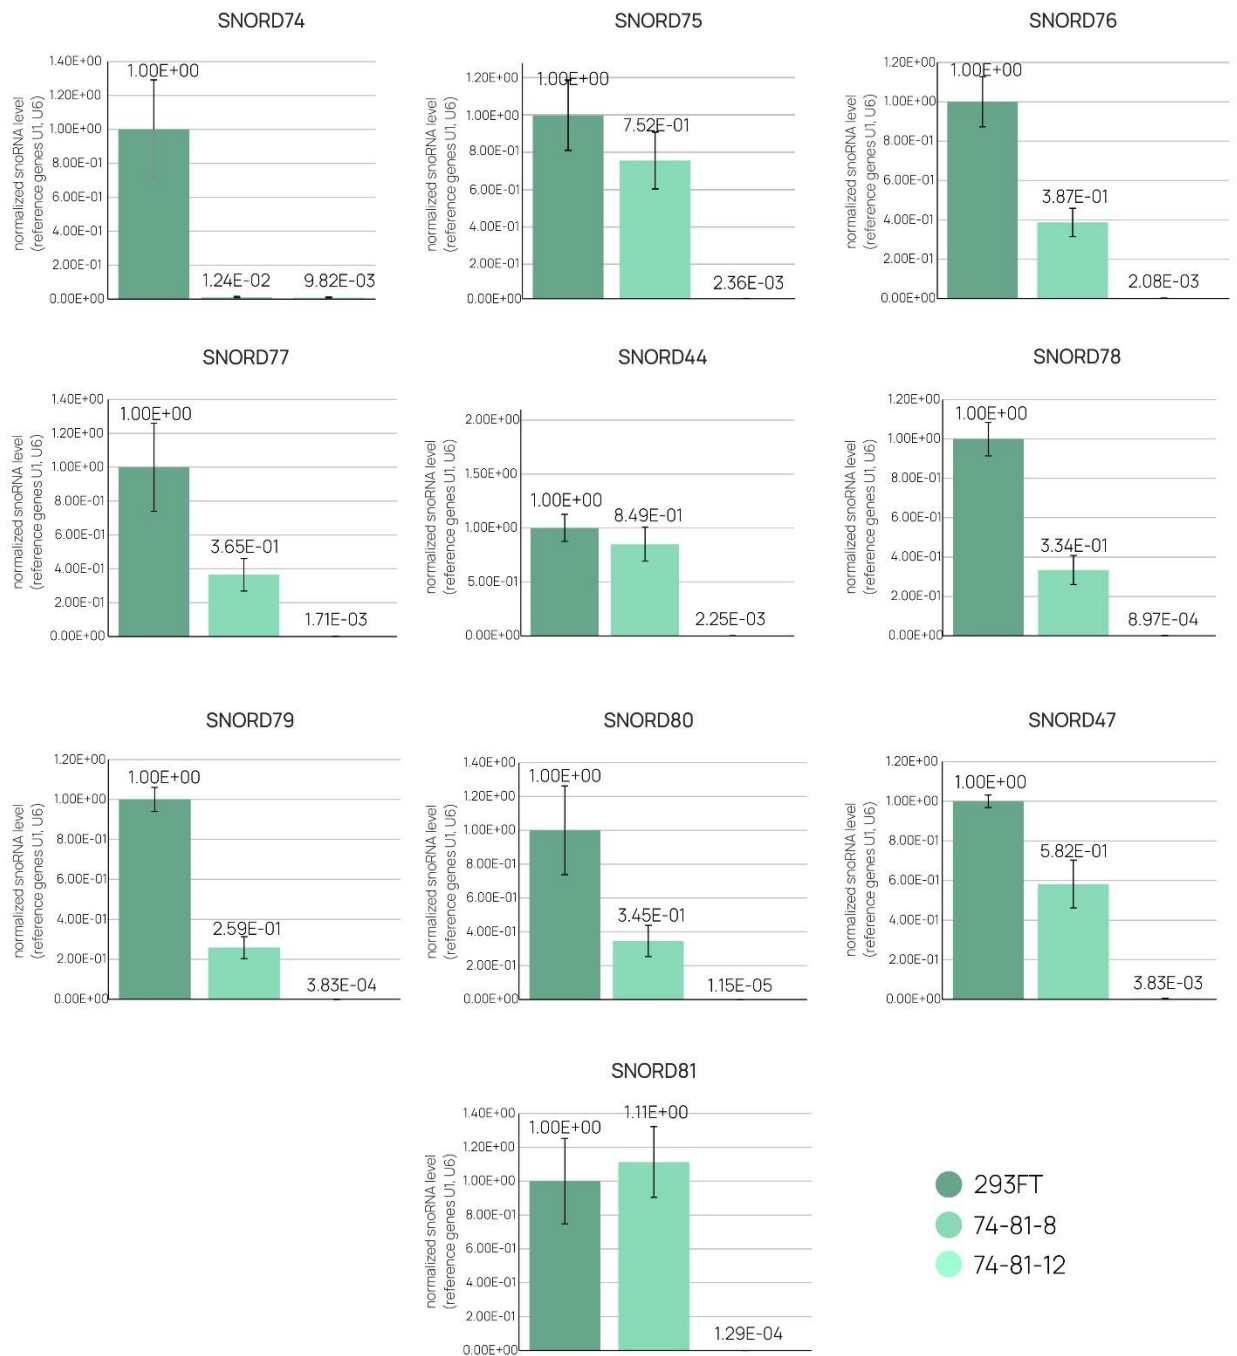

**Supplementary Figure S2.** Analysis of snoRNA expression in modified cell lines. 10 GAS5-encoded box-C/D-snoRNAs level was assessed using qRT-PCR with detection in real-time. U1, U6 snRNA genes were used as references. The normalized to control 293FT cell line level is presented.

**Supplementary Table S1.** DAVID and ENRICHR analysis and functional annotations for the upregulated DEGs. Table sections are colored in coordination with the Figure 8B.

| Cell line | Category                                               | Term                                                     | Genes                                                                           | P-value |
|-----------|--------------------------------------------------------|----------------------------------------------------------|---------------------------------------------------------------------------------|---------|
| 74-81-8   | <b>DAVID Functional Annotation Chart</b>               |                                                          |                                                                                 |         |
|           | GOTERM_MF_DIRECT                                       | GO:0005198~structural molecule activity                  | KRT17, KRT75, CRYAB                                                             | 0,012   |
|           | GOTERM_BP_DIRECT                                       | GO:0031069~hair follicle morphogenesis                   | KRT17, FOXE1                                                                    | 0,026   |
|           | GOTERM_CC_DIRECT                                       | GO:0001533~cornified envelope                            | KRT17, KRT75                                                                    | 0,046   |
|           | UP_SEQ_FEATURE                                         | REGION: Coil 2                                           | KRT17, KRT75                                                                    | 0,049   |
|           | UP_SEQ_FEATURE                                         | REGION: Linker 12                                        | KRT17, KRT75                                                                    | 0,049   |
|           | INTERPRO                                               | IPR018039: Intermediate filament protein, conserved site | KRT17, KRT75                                                                    | 0,049   |
|           | <b>ENCODE_and_ChEA_Consensus_TFs_from_ChIP-X_table</b> |                                                          |                                                                                 |         |
|           | SUZ12 CHEA                                             |                                                          | EPHA6, FOXE1, PIGZ, CD24, CACNG4                                                | 0,022   |
| 74-81-12  | <b>DAVID Functional Annotation Chart</b>               |                                                          |                                                                                 |         |
|           | GOTERM_CC_DIRECT                                       | GO:0009986~cell surface                                  | SCARA5, LIPG, LPAR2, CD24, CACNG4                                               | 0,001   |
|           | GOTERM_CC_DIRECT                                       | GO:0005887~integral component of plasma membrane         | ASIC4, SCARA5, LPAR2, RHBDL1, CACNG4, DRD4                                      | 0,003   |
|           | UP_KW_DOMAIN                                           | KW-1133~Transmembrane helix                              | RNF112, ASIC4, SCARA5, RDH16, LPAR2, MMD2, PKD1L2, RHBDL1, CACNG4, DRD4, VSTM2B | 0,008   |
|           | UP_KW_DOMAIN                                           | KW-0812~Transmembrane                                    | RNF112, ASIC4, SCARA5, RDH16, LPAR2, MMD2, PKD1L2, RHBDL1, CACNG4, DRD4, VSTM2B | 0,009   |
|           | UP_KW_BIOLOGICAL_PROCESS                               | KW-0406~Ion transport                                    | ASIC4, SCARA5, PKD1L2, CACNG4                                                   | 0,012   |
|           | UP_SEQ_FEATURE                                         | TOPO_DOM: Cytoplasmic                                    | ASIC4, SCARA5, LPAR2, MMD2, PKD1L2, CACNG4, DRD4, VSTM2B                        | 0,013   |
|           | UP_SEQ_FEATURE                                         | TOPO_DOM: Extracellular                                  | ASIC4, SCARA5, LPAR2, PKD1L2, CACNG4, DRD4, VSTM2B                              | 0,014   |
|           | SMART                                                  | SM00308:LH2                                              | LIPG, PKD1L2                                                                    | 0,015   |
|           | UP_SEQ_FEATURE                                         | DOMAIN: PLAT                                             | LIPG, PKD1L2                                                                    | 0,016   |
|           | INTERPRO                                               | IPR001024: Lipxygenase, LH2                              | LIPG, PKD1L2                                                                    | 0,016   |
|           | GOTERM_BP_DIRECT                                       | GO:0001662~behavioral fear response                      | ASIC4, DRD4                                                                     | 0,021   |
|           | UP_SEQ_FEATURE                                         | TRANSMEM: Helical                                        | RNF112, ASIC4, RDH16, LPAR2, MMD2, PKD1L2, RHBDL1, CACNG4, VSTM2B               | 0,025   |

|        |                                                 |                                                                                 |                                                                                       |        |
|--------|-------------------------------------------------|---------------------------------------------------------------------------------|---------------------------------------------------------------------------------------|--------|
|        | UP_SEQ_FEATURE                                  | CARBOHYD: N-linked (GlcNAc...) asparagine                                       | ASIC4, SCARA5, LIPG, LPAR2, PKD1L2, CD24, CACNG4, DRD4                                | 0,026  |
|        | UP_KW_CELLULAR_COMPONENT                        | KW-0472~Membrane                                                                | RNF112, ASIC4, SCARA5, RDH16, LPAR2, MMD2, PKD1L2, CD24, RHBDL1, CACNG4, DRD4, VSTM2B | 0,033  |
|        | GOTERM_CC_DIRECT                                | GO:0098978~glutamatergic synapse                                                | LPAR2, CACNG4, DRD4                                                                   | 0,037  |
|        | ENCODE_and_ChEA_Consensus_TFs_from_ChIP-X_table |                                                                                 |                                                                                       |        |
|        | SUZ12 CHEA                                      |                                                                                 | LIPG, CD24, DRD4, CACNG4, VSTM2B                                                      | 0,022  |
|        | ENCODE TF ChIP-seq 2015                         |                                                                                 |                                                                                       |        |
|        | EZH2 B cell hg19                                |                                                                                 | LIPG, YPEL4, DRD4, RHBDL1, CACNG4, VSTM2B                                             | 0,011  |
|        | EZH2 skeletal muscle myoblast hg19              |                                                                                 | SCARA5, LIPG, MMD2, CD24, CACNG4                                                      | 0,043  |
|        | DAVID Functional Annotation Chart               |                                                                                 |                                                                                       |        |
| 74-4-3 | INTERPRO                                        | IPR021156: Transcription elongation factor A-like/Brain expressed X-linked-like | TCEAL7, BEX5                                                                          | 0,012  |
|        | UP_KW_PTM                                       | KW-0165~Cleavage on pair of basic residues                                      | CALCB, ADAMTS18, OSTN                                                                 | 0,030  |
|        | UP_KW_PTM                                       | KW-0027~Amidation                                                               | CALCB, OSTN                                                                           | 0,045  |
|        | UP_KW_MOLECULAR_FUNCTION                        | KW-0401~Integrin                                                                | ITGA4, ADAMTS18                                                                       | 0,047  |
|        | ENCODE_and_ChEA_Consensus_TFs_from_ChIP-X_table |                                                                                 |                                                                                       |        |
|        | SMAD4 CHEA                                      |                                                                                 | ITGA4, LDB2, PCDH19                                                                   | 0,020  |
| 74-4-4 | DAVID Functional Annotation Chart               |                                                                                 |                                                                                       |        |
|        | UP_SEQ_FEATURE                                  | CARBOHYD: N-linked (GlcNAc...) asparagine                                       | NELL1, F8, CD40, IGLON5, CCL2, GABRE, KCNK2, MXRA5, DUOX2, GBGT1, ASTN1               | 0,0009 |
|        | UP_KW_PTM                                       | KW-0325~Glycoprotein                                                            | NELL1, F8, CD40, CTNND2, IGLON5, CCL2, GABRE, KCNK2, MXRA5, DUOX2, GBGT1, ASTN1       | 0,0020 |
|        | UP_KW_PTM                                       | KW-1015~Disulfide bond                                                          | NELL1, F8, CD40, IGLON5, CCL2, GABRE, KCNK2, MXRA5, DUOX2, ASTN1                      | 0,0076 |
|        | UP_KW_DOMAIN                                    | KW-0732~Signal                                                                  | NELL1, F8, CD40, IGLON5, CCL2, SOX11, GABRE, MXRA5, DUOX2, ASTN1                      | 0,0089 |
|        | GOTERM_BP_DIRECT                                | GO:0045778~positive regulation of ossification                                  | NELL1, SOX11                                                                          | 0,0122 |
|        | GOTERM_MF_DIRECT                                | GO:0016491~oxidoreductase activity                                              | F8, NOS1, VAT1L                                                                       | 0,0124 |
|        | UP_SEQ_FEATURE                                  | DOMAIN: FAD-binding FR-type                                                     | NOS1, DUOX2                                                                           | 0,0172 |

|      |                                                        |                                                                                |                                                                        |        |
|------|--------------------------------------------------------|--------------------------------------------------------------------------------|------------------------------------------------------------------------|--------|
|      | INTERPRO                                               | IPR017927:<br>Ferredoxin<br>reductase-type<br>FAD-binding<br>domain            | NOS1, DUOX2                                                            | 0,0174 |
|      | INTERPRO                                               | IPR017938:<br>Riboflavin<br>synthase-like beta-<br>barrel                      | NOS1, DUOX2                                                            | 0,0183 |
|      | GOTERM_B<br>P_DIRECT                                   | GO:2000353~positiv<br>e regulation of<br>endothelial cell<br>apoptotic process | CD40, CCL2                                                             | 0,0185 |
|      | UP_KW_DO<br>MAIN                                       | KW-0677~Repeat                                                                 | SPRR2F, NELL1, F8, CD40, CTNND2,<br>IGLON5, KLHL4, MXRA5, DUOX2, ASTN1 | 0,0224 |
|      | BBID                                                   | 19.Cytokine_micro<br>glia                                                      | CD40, CCL2                                                             | 0,0284 |
|      | UP_KW_CE<br>LLULAR_C<br>OMPONEN<br>T                   | KW-0964~Secreted                                                               | NELL1, F8, CD40, IGLON5, CCL2, MXRA5                                   | 0,0360 |
|      | GOTERM_B<br>P_DIRECT                                   | GO:0007399~nervo<br>us system<br>development                                   | NELL1, BEX1, SOX11                                                     | 0,0364 |
|      | KEGG_PAT<br>HWAY                                       | hsa05144: Malaria                                                              | CD40, CCL2                                                             | 0,0457 |
|      | <b>ENCODE_and_ChEA_Consensus_TFs_from_ChIP-X_table</b> |                                                                                |                                                                        |        |
|      | SUZ12 CHEA                                             |                                                                                | NELL1, CTNND2, SOX11, KCNK2,<br>DUOX2, VAT1L                           | 0,005  |
|      | REST CHEA                                              |                                                                                | NELL1, CTNND2, NOS1, VAT1L, ASTN1                                      | 0,007  |
|      | EGR1 CHEA                                              |                                                                                | NOS1, KCNK2                                                            | 0,039  |
|      | TP63 CHEA                                              |                                                                                | CD40, CTNND2, NOS1, MXRA5                                              | 0,047  |
|      | <b>DAVID Functional Annotation Chart</b>               |                                                                                |                                                                        |        |
| 81-6 | GOTERM_C<br>C_DIRECT                                   | GO:0009986~cell<br>surface                                                     | SRPX2, SCARA5, CD24, CRYAB, CD44                                       | 0,001  |
|      | GOTERM_C<br>C_DIRECT                                   | GO:0070062~extrac<br>ellular exosome                                           | GPRC5A, PCK1, KRT75, CRYAB,<br>ALDH1L2, CD44, RHOB                     | 0,005  |
|      | GOTERM_B<br>P_DIRECT                                   | GO:0098609~cell-<br>cell adhesion                                              | SRPX2, CD24, CD44                                                      | 0,011  |
|      | GOTERM_B<br>P_DIRECT                                   | GO:0042325~regula<br>tion of<br>phosphorylation                                | SRPX2, CD24                                                            | 0,013  |
|      | GOTERM_B<br>P_DIRECT                                   | GO:0001525~angiog<br>enesis                                                    | SRPX2, ADM2, RHOB                                                      | 0,018  |
|      | GOTERM_B<br>P_DIRECT                                   | GO:0016477~cell<br>migration                                                   | CD24, CD44, RHOB                                                       | 0,021  |
|      | GOTERM_C<br>C_DIRECT                                   | GO:0097060~synapt<br>ic membrane                                               | SRPX2, CRYAB                                                           | 0,031  |
|      | GOTERM_B<br>P_DIRECT                                   | GO:0043154~negati<br>ve regulation of<br>cysteine-type<br>endopeptidase        | CRYAB, CD44                                                            | 0,045  |

|  |                                                        |                                        |                                                          |       |
|--|--------------------------------------------------------|----------------------------------------|----------------------------------------------------------|-------|
|  |                                                        | activity involved in apoptotic process |                                                          |       |
|  | UP_KW_CELLULAR_COMPONENT                               | KW-1003~Cell membrane                  | GPRC5A, SCARA5, SH2D3C, SLCO5A1, CD24, PDE9A, CD44, RHOB | 0,047 |
|  | <b>ENCODE_and_ChEA_Consensus_TFs_from_ChIP-X_table</b> |                                        |                                                          |       |
|  | SOX2 CHEA                                              |                                        | SLCO5A1, CD24, KLF2, RHOB                                | 0,007 |
|  | <b>ENCODE TF ChIP-seq 2015</b>                         |                                        |                                                          |       |
|  | EZH2 skeletal muscle myoblast hg19                     |                                        | SCARA5, ADM2, SLCO5A1, C6ORF141, CD24, CRYAB, PDE9A      | 0,002 |
|  | MEF2C GM12878 hg19                                     |                                        | KLF2, RHOB                                               | 0,010 |
|  | FOS endothelial cell of umbilical vein hg19            |                                        | C11ORF96, SRPX2, GPRC5A, CD44, RHOB                      | 0,043 |
|  | CBX8 K562 hg19                                         |                                        | C11ORF96, SRPX2, GPRC5A, ALDH1L2, PDE9A                  | 0,043 |

**Supplementary Table S2.** DAVID and ENRICHR analysis and functional annotations for the downregulated DEGs. Table sections are colored in coordination with the Figure 8C.

| Cell line | Category                                 | Term                                                  | Genes                                                                                                                                                                                                                                              | p-value  |
|-----------|------------------------------------------|-------------------------------------------------------|----------------------------------------------------------------------------------------------------------------------------------------------------------------------------------------------------------------------------------------------------|----------|
| 74-81-8   | <b>DAVID Functional Annotation Chart</b> |                                                       |                                                                                                                                                                                                                                                    |          |
|           | UP_KW_PTM                                | KW-1015~Disulfide bond                                | TENM1, RAMP2, ENPEP, NRROS, CFI, FZD10, SLC7A11, ADAMTS12, EDNRA, SPOCK3, SOSTDC1, OXGR1, GABRQ, SRGN, LUM, VEGFC, GPR50, INHBE, POMC, GALC, XK, SLCO3A1, FABP5, SCO2, PXDN, MXRA8, FOSB, LGR5, TLR3, GPR19                                        | 7,93E-05 |
|           | UP_KW_PTM                                | KW-0325~Glycoprotein                                  | TENM1, RAMP2, ENPEP, NRROS, PCDH10, CFI, FZD10, SLC7A11, ADAMTS12, EDNRA, GPNMB, SPOCK3, SOSTDC1, QRFPR, OXGR1, GABRQ, SRGN, SLC10A4, LUM, P3H2, VEGFC, INHBE, POMC, GALC, SLCO3A1, DCT, SELENOP, PXDN, MXRA8, COL21A1, LGR5, TLR3, TRABD2A, GPR19 | 9,12E-05 |
|           | UP_SEQ_FEATURE                           | REPEAT: LRR 11                                        | NRROS, LUM, LGR5, FBXL7, TLR3                                                                                                                                                                                                                      | 0,0005   |
|           | UP_SEQ_FEATURE                           | REPEAT: LRR 8                                         | NRROS, LUM, PXDN, LGR5, FBXL7, TLR3                                                                                                                                                                                                                | 0,0007   |
|           | UP_SEQ_FEATURE                           | DOMAIN: LRRNT                                         | NRROS, LUM, PXDN, LGR5, TLR3                                                                                                                                                                                                                       | 0,0008   |
|           | UP_SEQ_FEATURE                           | REPEAT: LRR 10                                        | NRROS, LUM, LGR5, FBXL7, TLR3                                                                                                                                                                                                                      | 0,0010   |
|           | UP_SEQ_FEATURE                           | REPEAT: LRR 7                                         | NRROS, LUM, PXDN, LGR5, FBXL7, TLR3                                                                                                                                                                                                                | 0,0015   |
|           | UP_SEQ_FEATURE                           | CARBOHYD: N-linked (GlcNAc...) asparagine             | TENM1, RAMP2, ENPEP, NRROS, PCDH10, CFI, FZD10, SLC7A11, ADAMTS12, EDNRA, GPNMB, SOSTDC1, QRFPR, OXGR1, GABRQ, SLC10A4, P3H2, VEGFC, INHBE, POMC, GALC, SLCO3A1, DCT, SELENOP, PXDN, MXRA8, COL21A1, LGR5, TLR3, TRABD2A, GPR19                    | 0,0015   |
|           | GOTERM_CC_DIRECT                         | GO:0005887~integral component of plasma membrane      | GABRQ, TENM1, ENPEP, RAMP2, PCDH10, GPR50, FZD10, EDNRA, SLCO3A1, GPNMB, QRFPR, LGR5, TLR3, TRABD2A, GPR19                                                                                                                                         | 0,0019   |
|           | UP_SEQ_FEATURE                           | REPEAT: LRR 6                                         | NRROS, LUM, PXDN, LGR5, FBXL7, TLR3                                                                                                                                                                                                                | 0,0024   |
|           | GOTERM_MF_DIRECT                         | GO:0005324~long-chain fatty acid transporter activity | FABP5, SLC27A6, SLC27A5                                                                                                                                                                                                                            | 0,0025   |
|           | GOTERM_BP_DIRECT                         | GO:0030199~collagen fibril organization               | LUM, PXDN, COL21A1, ADAMTS12                                                                                                                                                                                                                       | 0,0038   |

|                  |                                                                  |                                                                                                                                                                                                               |        |
|------------------|------------------------------------------------------------------|---------------------------------------------------------------------------------------------------------------------------------------------------------------------------------------------------------------|--------|
| UP_SEQ_FEATURE   | REPEAT: LRR 9                                                    | NRROS, LUM, LGR5, FBXL7, TLR3                                                                                                                                                                                 | 0,0039 |
| UP_SEQ_FEATURE   | REPEAT: LRR 5                                                    | NRROS, LUM, PXDN, LGR5, FBXL7, TLR3                                                                                                                                                                           | 0,0042 |
| UP_SEQ_FEATURE   | REPEAT: LRR 4                                                    | NRROS, LUM, PXDN, LGR5, FBXL7, TLR3                                                                                                                                                                           | 0,0043 |
| GOTERM_BP_DIRECT | GO:0008217~regulation of blood pressure                          | POMC, EDNRA, RAMP2, ENPEP                                                                                                                                                                                     | 0,0047 |
| SMART            | SM00369: LRR_TYP                                                 | NRROS, LUM, PXDN, LGR5, TLR3                                                                                                                                                                                  | 0,0049 |
| UP_SEQ_FEATURE   | REPEAT: LRR 3                                                    | NRROS, LUM, PXDN, LGR5, FBXL7, TLR3                                                                                                                                                                           | 0,0053 |
| INTERPRO         | IPR001611: Leucine-rich repeat                                   | NRROS, LUM, PXDN, LGR5, FBXL7, TLR3                                                                                                                                                                           | 0,0057 |
| UP_SEQ_FEATURE   | REPEAT: LRR 2                                                    | NRROS, LUM, PXDN, LGR5, FBXL7, TLR3                                                                                                                                                                           | 0,0060 |
| UP_KW_DO_MAIN    | KW-0732~Signal                                                   | RAMP2, NRROS, PCDH10, CFI, FZD10, ADAMTS12, EDNRA, GPNMB, SPOCK3, SOSTDC1, LRAT, GABRQ, IL32, SRGN, LUM, P3H2, VEGFC, INHBE, POMC, GALC, XK, SLCO3A1, DCT, SELENOP, PXDN, MXRA8, COL21A1, LGR5, TLR3, TRABD2A | 0,0061 |
| UP_SEQ_FEATURE   | REPEAT: LRR 1                                                    | NRROS, LUM, PXDN, LGR5, FBXL7, TLR3                                                                                                                                                                           | 0,0063 |
| GOTERM_BP_DIRECT | GO:0007165~signal transduction                                   | GABRQ, IL32, TENM1, ENPEP, VEGFC, RERG, ARHGAP24, INHBE, POMC, EDNRA, GPNMB, PDE3A, TLR3                                                                                                                      | 0,0063 |
| UP_KW_PT_M       | KW-0165~Cleavage on pair of basic residues                       | POMC, TENM1, CFI, VEGFC, ADAMTS12, INHBE                                                                                                                                                                      | 0,0067 |
| INTERPRO         | IPR003591: Leucine-rich repeat, typical subtype                  | NRROS, LUM, PXDN, LGR5, TLR3                                                                                                                                                                                  | 0,0075 |
| GOTERM_BP_DIRECT | GO:0034346~positive regulation of type III interferon production | IL32, TLR3                                                                                                                                                                                                    | 0,0081 |
| GOTERM_BP_DIRECT | GO:1990830~cellular response to leukemia inhibitory factor       | MAT2A, VEGFC, LRAT, TEX14                                                                                                                                                                                     | 0,0094 |
| UP_SEQ_FEATURE   | REPEAT: LRR 16                                                   | NRROS, LGR5, TLR3                                                                                                                                                                                             | 0,0108 |
| UP_KW_DO_MAIN    | KW-0433~Leucine-rich repeat                                      | NRROS, LUM, PXDN, LGR5, FBXL7, TLR3                                                                                                                                                                           | 0,0118 |
| GOTERM_BP_DIRECT | GO:0032870~cellular response to hormone stimulus                 | RAMP2, FOSB, QRFPR                                                                                                                                                                                            | 0,0132 |
| UP_SEQ_FEATURE   | REPEAT: LRR 15                                                   | NRROS, LGR5, TLR3                                                                                                                                                                                             | 0,0154 |
| UP_SEQ_FEATURE   | REPEAT: LRR 14                                                   | NRROS, LGR5, TLR3                                                                                                                                                                                             | 0,0161 |



|                          |                                                         |                                                                                                                                                                                                                                         |        |
|--------------------------|---------------------------------------------------------|-----------------------------------------------------------------------------------------------------------------------------------------------------------------------------------------------------------------------------------------|--------|
| UP_SEQ_FEATURE           | DOMAIN: Kazal-like                                      | SLCO3A1, CFI, SPOCK3                                                                                                                                                                                                                    | 0,0180 |
| INTERPRO                 | IPR002350: Kazal domain                                 | SLCO3A1, CFI, SPOCK3                                                                                                                                                                                                                    | 0,0202 |
| GOTERM_C_C_DIRECT        | GO:0031012~extracellular matrix                         | LUM, SPOCK3, PXDN, ADAMTS12, TLR3                                                                                                                                                                                                       | 0,0205 |
| INTERPRO                 | IPR013024: Butirosin biosynthesis, BtrG-like            | CHAC1, GGACT                                                                                                                                                                                                                            | 0,0213 |
| UP_SEQ_FEATURE           | TRANSMEM: Helical                                       | TENM1, RAMP2, ENPEP, NRROS, PCDH10, FZD10, SLC7A11, NKAIN2, GPNMB, MYADML2, LRAT, QRFPR, OXGR1, GABRQ, SLC10A4, GPR50, CYP7B1, XK, SLCO3A1, DCT, ACTBL2, FES, SCO2, SELENOP, PDE3A, MXRA8, SLC27A6, LGR5, SLC27A5, TLR3, TRABD2A, GPR19 | 0,0213 |
| UP_SEQ_FEATURE           | REPEAT:LRR 13                                           | NRROS, LGR5, TLR3                                                                                                                                                                                                                       | 0,0222 |
| UP_SEQ_FEATURE           | TOPO_DOM: Extracellular                                 | GABRQ, SLC10A4, TENM1, ENPEP, RAMP2, NRROS, PCDH10, GPR50, SLC7A11, FZD10, EDNRA, XK, SLCO3A1, GPNMB, MXRA8, QRFPR, LGR5, TRABD2A, GPR19, OXGR1                                                                                         | 0,0260 |
| GOTERM_C_C_DIRECT        | GO:0005615~extracellular space                          | SRGN, IL32, LUM, CFI, VEGFC, SERPINB8, INHBE, POMC, ACTBL2, FABP5, SPOCK3, PXDN, SOSTDC1, COL21A1, TLR3                                                                                                                                 | 0,0265 |
| GOTERM_BP_DIRECT         | GO:0007155~cell adhesion                                | IL32, GPNMB, FES, PCDH10, PXDN, MXRA8, SLC7A11                                                                                                                                                                                          | 0,0276 |
| GOTERM_MF_DIRECT         | GO:0015245~fatty acid transporter activity              | SLC27A6, SLC27A5                                                                                                                                                                                                                        | 0,0306 |
| GOTERM_BP_DIRECT         | GO:0048066~developmental pigmentation                   | EDNRA, DCT                                                                                                                                                                                                                              | 0,0320 |
| UP_KW_CELLULAR_COMPONENT | KW-0272~Extracellular matrix                            | LUM, SPOCK3, PXDN, COL21A1, ADAMTS12                                                                                                                                                                                                    | 0,0323 |
| UP_SEQ_FEATURE           | REPEAT: LRR 12                                          | NRROS, LGR5, TLR3                                                                                                                                                                                                                       | 0,0378 |
| GOTERM_BP_DIRECT         | GO:0097084~vascular smooth muscle cell development      | EDNRA, RAMP2                                                                                                                                                                                                                            | 0,0399 |
| GOTERM_BP_DIRECT         | GO:0007186~G-protein coupled receptor signaling pathway | EDNRA, RAMP2, PDE3A, GPR50, FZD10, QRFPR, LGR5, GPR19, OXGR1                                                                                                                                                                            | 0,0423 |
| GOTERM_MF_DIRECT         | GO:0031957~very long-chain fatty                        | SLC27A6, SLC27A5                                                                                                                                                                                                                        | 0,0434 |

|          |                                                                              |                                                                                                                            |                                                                             |          |
|----------|------------------------------------------------------------------------------|----------------------------------------------------------------------------------------------------------------------------|-----------------------------------------------------------------------------|----------|
|          |                                                                              | acid-CoA ligase activity                                                                                                   |                                                                             |          |
|          | UP_SEQ_FEATURE                                                               | REPEAT: LRR 21                                                                                                             | NRROS, TLR3                                                                 | 0,0473   |
|          | GOTERM_BP_DIRECT                                                             | GO:0070831~basement membrane assembly                                                                                      | RAMP2, PXDN                                                                 | 0,0477   |
|          | <b>ENCODE_and_ChEA_Consensus_TFs_from_ChIP-X_table</b>                       |                                                                                                                            |                                                                             |          |
|          | CEBPB ENCODE                                                                 |                                                                                                                            | SLC7A11, CHAC1                                                              | 0,009    |
|          | SUZ12 CHEA                                                                   |                                                                                                                            | EGR3, SPOCK3, QRFPR, RERG, FBXL7                                            | 0,022    |
|          | <b>WikiPathway_2023_Human_table</b>                                          |                                                                                                                            |                                                                             |          |
|          | P53 Transcriptional Gene Network WP4963                                      |                                                                                                                            | SCO2, SLC7A11, MLH1                                                         | 9,82E-05 |
|          | mRNA Protein And Metabolite Induction Pathway By Cyclosporin A WP3953        |                                                                                                                            | SLC7A11                                                                     | 0,007    |
|          | Amino Acid Metabolism In Triple Negative Breast Cancer Cells WP5213          |                                                                                                                            | SLC7A11                                                                     | 0,007    |
|          | Transcriptional Activation By NRF2 In Response To Phytochemicals WP3         |                                                                                                                            | SLC7A11                                                                     | 0,015    |
|          | DNA Mismatch Repair WP531                                                    |                                                                                                                            | MLH1                                                                        | 0,023    |
|          | NRF2 ARE Regulation WP4357                                                   |                                                                                                                            | SLC7A11                                                                     | 0,023    |
|          | Antiviral And Anti Inflammatory Effects Of Nrf2 On SARS CoV 2 Pathway WP5113 |                                                                                                                            | SLC7A11                                                                     | 0,031    |
|          | Ovarian Infertility WP34                                                     |                                                                                                                            | MLH1                                                                        | 0,036    |
|          | Nuclear Receptors Meta Pathway WP2882                                        |                                                                                                                            | SRGN;SLC7A11                                                                | 0,039    |
|          | Exercise Induced Circadian Regulation WP410                                  |                                                                                                                            | G0S2                                                                        | 0,047    |
| 74-81-12 | <b>DAVID Functional Annotation Chart</b>                                     |                                                                                                                            |                                                                             |          |
|          | GOTERM_BP_DIRECT                                                             | GO:0035914~skeletal muscle cell differentiation                                                                            | EGR1, HLF, FOS                                                              | 0,0008   |
|          | INTERPRO                                                                     | IPR021849: Protein of unknown function DUF3446                                                                             | EGR1, EGR3                                                                  | 0,0022   |
|          | GOTERM_MF_DIRECT                                                             | GO:0001228~transcriptional activator activity, RNA polymerase II transcription regulatory region sequence-specific binding | EGR1, EGR3, HLF, FOS                                                        | 0,0059   |
|          | UP_SEQ_FEATURE                                                               | COMPBIAS: Basic and acidic residues                                                                                        | EGR1, EGR3, HLF, CCDC116, PCDH10, TCEANC, AGAP11, PDE3A, ZNF804A, NEFM, FOS | 0,0067   |
|          | GOTERM_MF_DIRECT                                                             | GO:1990837~sequence-specific double-                                                                                       | EGR1, EGR3, HLF, FOS                                                        | 0,0089   |

|  |                                                        |                                                                                           |                                          |          |
|--|--------------------------------------------------------|-------------------------------------------------------------------------------------------|------------------------------------------|----------|
|  |                                                        | stranded DNA binding                                                                      |                                          |          |
|  | GOTERM_MF_DIRECT                                       | GO:0003700~transcription factor activity, sequence-specific DNA binding                   | EGR1, EGR3, HLF, FOS                     | 0,0117   |
|  | GOTERM_MF_DIRECT                                       | GO:0043565~sequence-specific DNA binding                                                  | EGR1, HLF, FOS                           | 0,0298   |
|  | GOTERM_BP_DIRECT                                       | GO:1901216~positive regulation of neuron death                                            | EGR1, FOS                                | 0,0318   |
|  | UP_SEQ_FEATURE                                         | DOMAIN: BZIP                                                                              | HLF, FOS                                 | 0,0381   |
|  | INTERPRO                                               | IPR004827: Basic-leucine zipper domain                                                    | HLF, FOS                                 | 0,0402   |
|  | GOTERM_BP_DIRECT                                       | GO:0014823~response to activity                                                           | SCO2, FOS                                | 0,0428   |
|  | UP_SEQ_FEATURE                                         | DOMAIN: bZIP                                                                              | HLF, FOS                                 | 0,0445   |
|  | SMART                                                  | SM00338: BRLZ                                                                             | HLF, FOS                                 | 0,0451   |
|  | GOTERM_BP_DIRECT                                       | GO:1902895~positive regulation of pri-miRNA transcription from RNA polymerase II promoter | EGR1, FOS                                | 0,0453   |
|  | <b>ENCODE_and_ChEA_Consensus_TFs_from_ChIP-X_table</b> |                                                                                           |                                          |          |
|  | NELFE ENCODE                                           |                                                                                           | EGR1, FOS, GAS5                          | 0,0016   |
|  | ZMIZ1 ENCODE                                           |                                                                                           | EGR1, SCO2, TCEANC, HSF2BP, CHAC1        | 0,0017   |
|  | SRF ENCODE                                             |                                                                                           | EGR1, EGR3, FOS                          | 0,0031   |
|  | TAF7 ENCODE                                            |                                                                                           | EGR1, HSF2BP, FOS, GAS5                  | 0,0033   |
|  | MAX ENCODE                                             |                                                                                           | HLF, SCO2, TCEANC, HSF2BP, C6ORF52, GAS5 | 0,0133   |
|  | TRIM28 CHEA                                            |                                                                                           | EGR1, NEFM                               | 0,0184   |
|  | CREB1 ENCODE                                           |                                                                                           | EGR1, EGR3, HSF2BP, FOS, C6ORF52, GAS5   | 0,0189   |
|  | SUZ12 CHEA                                             |                                                                                           | EGR3, HLF, PCDH10, PDE3A, NEFM           | 0,0224   |
|  | NFIC ENCODE                                            |                                                                                           | EGR1, FOS                                | 0,0312   |
|  | STAT3 ENCODE                                           |                                                                                           | EGR1, TCEANC, FOS                        | 0,0342   |
|  | USF1 ENCODE                                            |                                                                                           | SCO2, TCEANC, C6ORF52, GAS5              | 0,0495   |
|  | NELFE ENCODE                                           |                                                                                           | EGR1, FOS, GAS5                          | 0,0016   |
|  | <b>BioPlanet_2019_table</b>                            |                                                                                           |                                          |          |
|  | Regulation of NFAT transcription factors               |                                                                                           | EGR1, EGR3, FOS                          | 1,35E-05 |
|  | Differentiation pathway in PC12 cells                  |                                                                                           | EGR1, EGR3, FOS                          | 7,74E-05 |
|  | Interleukin-5 regulation of apoptosis                  |                                                                                           | EGR1, EGR3, FOS                          | 0,0004   |

|        |                                          |                                                                         |                                                                                       |        |
|--------|------------------------------------------|-------------------------------------------------------------------------|---------------------------------------------------------------------------------------|--------|
|        | MAPK/TRK pathway                         |                                                                         | EGR1, FOS                                                                             | 0,0005 |
|        | CD8/T cell receptor downstream pathway   |                                                                         | EGR1, FOS                                                                             | 0,0021 |
|        | BDNF signaling pathway                   |                                                                         | EGR1, EGR3, FOS                                                                       | 0,0021 |
|        | AP-1 transcription factor network        |                                                                         | EGR1, FOS                                                                             | 0,0022 |
|        | Insulin signaling pathway                |                                                                         | EGR1, PDE3A, FOS                                                                      | 0,0025 |
|        | Regular glucocorticoid receptor pathway  |                                                                         | EGR1, FOS                                                                             | 0,0030 |
| 74-4-3 | <b>DAVID Functional Annotation Chart</b> |                                                                         |                                                                                       |        |
|        | GOTERM_MF_DIRECT                         | GO:0052593~tryptamine: oxygen oxidoreductase (deaminating) activity     | AOC3, AOC2                                                                            | 0,0015 |
|        | GOTERM_MF_DIRECT                         | GO:0052594~amino acetone: oxygen oxidoreductase(deaminating) activity   | AOC3, AOC2                                                                            | 0,0015 |
|        | UP_KW_CELLULAR_COMPONENT                 | KW-0472~Membrane                                                        | AOC3, MMP14, ANKLE1, KCND1, AOC2, SLC43A3, CTSK, GUCA1B, CDHR5, GP1BA, DRD4, CEACAM19 | 0,0015 |
|        | UP_SEQ_FEATURE                           | ACT_SITE: Schiff-base intermediate with substrate; via topaquinone      | AOC3, AOC2                                                                            | 0,0019 |
|        | UP_SEQ_FEATURE                           | CARBOHYD: N-linked (GlcNAc...) asparagine                               | AOC3, KCND1, AOC2, SLC43A3, CTSK, CDHR5, GP1BA, DRD4, CEACAM19                        | 0,0020 |
|        | INTERPRO                                 | IPR015800: Copper amine oxidase, N2-terminal                            | AOC3, AOC2                                                                            | 0,0020 |
|        | INTERPRO                                 | IPR016182: Copper amine oxidase, N-terminal                             | AOC3, AOC2                                                                            | 0,0020 |
|        | INTERPRO                                 | IPR000269: Copper amine oxidase                                         | AOC3, AOC2                                                                            | 0,0020 |
|        | INTERPRO                                 | IPR015798: Copper amine oxidase, C-terminal                             | AOC3, AOC2                                                                            | 0,0020 |
|        | INTERPRO                                 | IPR015802: Copper amine oxidase, N3-terminal                            | AOC3, AOC2                                                                            | 0,0020 |
|        | GOTERM_MF_DIRECT                         | GO:0052596~phenethylamine: oxygen oxidoreductase (deaminating) activity | AOC3, AOC2                                                                            | 0,0029 |
|        | GOTERM_MF_DIRECT                         | GO:0052595~aliphatic-amine oxidase activity                             | AOC3, AOC2                                                                            | 0,0029 |

|                          |                                                    |                                                                         |        |
|--------------------------|----------------------------------------------------|-------------------------------------------------------------------------|--------|
| GOTERM_MF_DIRECT         | GO:0008131~primary amine oxidase activity          | AOC3, AOC2                                                              | 0,0044 |
| GOTERM_BP_DIRECT         | GO:0009308~amine metabolic process                 | AOC3, AOC2                                                              | 0,0060 |
| UP_KW_PTM                | KW-0801~TPQ                                        | AOC3, AOC2                                                              | 0,0062 |
| UP_KW_PTM                | KW-0325~Glycoprotein                               | AOC3, KCND1, AOC2, SLC43A3, CTSK, CDHR5, GP1BA, DRD4, CEACAM19          | 0,0094 |
| UP_KW_LIGAND             | KW-0106~Calcium                                    | AOC3, MMP14, AOC2, GUCA1B, CDHR5                                        | 0,0096 |
| GOTERM_MF_DIRECT         | GO:0048038~quino ne binding                        | AOC3, AOC2                                                              | 0,0103 |
| KEGG_PATHWAY             | hsa00360: Phenylalanine metabolism                 | AOC3, AOC2                                                              | 0,0130 |
| GOTERM_CC_DIRECT         | GO:0016021~integr al component of membrane         | AOC3, MMP14, ANKLE1, KCND1, SLC43A3, CTSK, CDHR5, GP1BA, CEACAM19       | 0,0150 |
| UP_KW_DOMAIN             | KW-1133~Transmembrane helix                        | AOC3, MMP14, ANKLE1, KCND1, SLC43A3, CTSK, CDHR5, GP1BA, DRD4, CEACAM19 | 0,0164 |
| UP_KW_DOMAIN             | KW-0812~Transmembrane                              | AOC3, MMP14, ANKLE1, KCND1, SLC43A3, CTSK, CDHR5, GP1BA, DRD4, CEACAM19 | 0,0175 |
| UP_SEQ_FEATURE           | TOPO_DOM:Cytoplasmic                               | AOC3, MMP14, KCND1, CDHR5, GP1BA, DRD4, CEACAM19                        | 0,0228 |
| KEGG_PATHWAY             | hsa00410: beta-Alanine metabolism                  | AOC3, AOC2                                                              | 0,0250 |
| GOTERM_BP_DIRECT         | GO:0030574~collagen catabolic process              | MMP14, CTSK                                                             | 0,0271 |
| KEGG_PATHWAY             | hsa00350: Tyrosine metabolism                      | AOC3, AOC2                                                              | 0,0290 |
| UP_SEQ_FEATURE           | TOPO_DOM: Extracellular                            | AOC3, MMP14, CDHR5, GP1BA, DRD4, CEACAM19                               | 0,0295 |
| GOTERM_BP_DIRECT         | GO:0022617~extracellular matrix disassembly        | MMP14, CTSK                                                             | 0,0303 |
| KEGG_PATHWAY             | hsa00260: Glycine, serine and threonine metabolism | AOC3, AOC2                                                              | 0,0322 |
| UP_KW_CELLULAR_COMPONENT | KW-1003~Cell membrane                              | AOC3, AOC2, SLC43A3, CTSK, GUCA1B, CDHR5, DRD4                          | 0,0329 |
| GOTERM_BP_DIRECT         | GO:0014070~response to organic cyclic compound     | MMP14, CTSK                                                             | 0,0432 |
| GOTERM_MF_DIRECT         | GO:0005507~copper ion binding                      | AOC3, AOC2                                                              | 0,0434 |

|        |                                                 |                                                                             |                                                                          |        |
|--------|-------------------------------------------------|-----------------------------------------------------------------------------|--------------------------------------------------------------------------|--------|
|        | UP_SEQ_FEATURE                                  | PROPEP:<br>Activation peptide                                               | MMP14, CTSK                                                              | 0,0476 |
|        | ENCODE_and_ChEA_Consensus_TFs_from_ChIP-X_table |                                                                             |                                                                          |        |
|        | GATA1 CHEA                                      |                                                                             | KCND1, SLC43A3, GP1BA                                                    | 0,045  |
|        | SALL4 CHEA                                      |                                                                             | SLC43A3, CTGF                                                            | 0,048  |
| 74-4-4 | GOTERM_BP_DIRECT                                | GO:0071300~cellular response to retinoic acid                               | YES1, BRINP3, EPHA3                                                      | 0,0016 |
|        | INTERPRO                                        | IPR020635: Tyrosine-protein kinase, catalytic domain                        | YES1, ERBB4, EPHA3                                                       | 0,0019 |
|        | UP_SEQ_FEATURE                                  | MOTIF: PDZ-binding                                                          | ERBB4, DLGAP1, EPHA3                                                     | 0,0022 |
|        | INTERPRO                                        | IPR008266: Tyrosine-protein kinase, active site                             | YES1, ERBB4, EPHA3                                                       | 0,0023 |
|        | SMART                                           | SM00219: TyrKc                                                              | YES1, ERBB4, EPHA3                                                       | 0,0032 |
|        | UP_KW_MOLECULAR_FUNCTION                        | KW-0829~Tyrosine-protein kinase                                             | YES1, ERBB4, EPHA3                                                       | 0,0033 |
|        | INTERPRO                                        | IPR009030: Insulin-like growth factor binding protein, N-terminal           | ERBB4, BRINP3, EPHA3                                                     | 0,0050 |
|        | INTERPRO                                        | IPR001245: Serine-threonine/tyrosine-protein kinase catalytic domain        | YES1, ERBB4, EPHA3                                                       | 0,0051 |
|        | GOTERM_BP_DIRECT                                | GO:0007169~transmembrane receptor protein tyrosine kinase signaling pathway | YES1, ERBB4, EPHA3                                                       | 0,0055 |
|        | UP_KW_DOMAIN                                    | KW-0677~Repeat                                                              | ZNF595, TENM1, ZNF91, CSRP1, ERBB4, ESRP2, KRTAP19-1, ZNF334, EPHA3      | 0,0113 |
|        | UP_SEQ_FEATURE                                  | ZN_FING: C2H2-type 13                                                       | ZNF595, ZNF91, ZNF334                                                    | 0,0114 |
|        | UP_SEQ_FEATURE                                  | ZN_FING: C2H2-type 12                                                       | ZNF595, ZNF91, ZNF334                                                    | 0,0175 |
|        | UP_SEQ_FEATURE                                  | ZN_FING: C2H2-type 11                                                       | ZNF595, ZNF91, ZNF334                                                    | 0,0219 |
|        | UP_KW_PTM                                       | KW-0597~Phosphoprotein                                                      | TENM1, YES1, GNAL, CSRP1, ERBB4, ESRP2, DLGAP1, CRYAB, CEP76, EPHA3, DDN | 0,0264 |
|        | UP_SEQ_FEATURE                                  | ZN_FING: C2H2-type 10                                                       | ZNF595, ZNF91, ZNF334                                                    | 0,0293 |
|        | INTERPRO                                        | IPR017441: Protein kinase, ATP binding site                                 | YES1, ERBB4, EPHA3                                                       | 0,0321 |
|        | UP_SEQ_FEATURE                                  | ZN_FING: C2H2-type 9                                                        | ZNF595, ZNF91, ZNF334                                                    | 0,0355 |

|      |                                   |                                                                     |                                          |        |
|------|-----------------------------------|---------------------------------------------------------------------|------------------------------------------|--------|
|      | UP_SEQ_FEATURE                    | DOMAIN: KRAB                                                        | ZNF595, ZNF91, ZNF334                    | 0,0374 |
|      | INTERPRO                          | IPR001909: Krueppel-associated box                                  | ZNF595, ZNF91, ZNF334                    | 0,0394 |
|      | UP_KW_BIOLOGICAL_PROCESS          | KW-0805~Transcription regulation                                    | ZNF595, TENM1, ZNF91, ERBB4, ZNF334      | 0,0403 |
|      | GOTERM_BP_DIRECT                  | GO:0048013~ephrin receptor signaling pathway                        | YES1, EPHA3                              | 0,0403 |
|      | UP_SEQ_FEATURE                    | ZN_FING: C2H2-type 8                                                | ZNF595, ZNF91, ZNF334                    | 0,0423 |
|      | UP_KW_BIOLOGICAL_PROCESS          | KW-0804~Transcription                                               | ZNF595, TENM1, ZNF91, ERBB4, ZNF334      | 0,0445 |
|      | GOTERM_MF_DIRECT                  | GO:0004714~trans membrane receptor protein tyrosine kinase activity | ERBB4, EPHA3                             | 0,0446 |
|      | GOTERM_BP_DIRECT                  | GO:0018108~peptidyl-tyrosine phosphorylation                        | ERBB4, EPHA3                             | 0,0466 |
|      | GOTERM_BP_DIRECT                  | GO:0007399~nervous system development                               | TENM1, ERBB4, BRINP3                     | 0,0467 |
|      | UP_SEQ_FEATURE                    | ZN_FING: C2H2-type 7                                                | ZNF595, ZNF91, ZNF334                    | 0,0480 |
|      | <b>ENCODE TF ChIP-seq 2015</b>    |                                                                     |                                          |        |
|      | NR2F2 MCF-7 hg19                  |                                                                     | ZNF595, CSRP1, ESRP2, GAS5               | 0,003  |
|      | EZH2 B cell hg19                  |                                                                     | ZNF595, YES1, GNAL, ESRP2, ERBB4, ZNF334 | 0,011  |
|      | MAFK GM12878 hg19                 |                                                                     | ZNF595, GNAL                             | 0,016  |
|      | EZH2 mammary epithelial cell hg19 |                                                                     | GNAL, GAS5, ZNF334, EPHA3, DDN           | 0,043  |
|      | POLR2A cerebellum mm9             |                                                                     | GNAL, CSRP1, ERBB4, CRYAB, EPHA3         | 0,043  |
| 81-6 | GOTERM_BP_DIRECT                  | GO:0071276~cellular response to cadmium ion                         | MT1F, MT1X, FOS                          | 0,0006 |
|      | INTERPRO                          | IPR021849: Protein of unknown function DUF3446                      | EGR1, EGR3                               | 0,0031 |
|      | INTERPRO                          | IPR000837: Fos transforming protein                                 | FOSB, FOS                                | 0,0094 |
|      | INTERPRO                          | IPR018064: Metallothionein, vertebrate, metal binding site          | MT1F, MT1X                               | 0,0104 |
|      | UP_SEQ_FEATURE                    | REGION: Beta                                                        | MT1F, MT1X                               | 0,0122 |
|      | UP_SEQ_FEATURE                    | REGION: Alpha                                                       | MT1F, MT1X                               | 0,0122 |



|  |                  |                                                                                                                            |                                   |        |
|--|------------------|----------------------------------------------------------------------------------------------------------------------------|-----------------------------------|--------|
|  | KEGG_PATHWAY     | hsa04928: Parathyroid hormone synthesis, secretion and action                                                              | EGR1, PDE4B, FOS                  | 0,0125 |
|  | GOTERM_BP_DIRECT | GO:0071248~cellular response to metal ion                                                                                  | MT1F, MT1X                        | 0,0126 |
|  | INTERPRO         | IPR000006: Metallothionein, vertebrate                                                                                     | MT1F, MT1X                        | 0,0135 |
|  | INTERPRO         | IPR017854: Metallothionein domain                                                                                          | MT1F, MT1X                        | 0,0145 |
|  | INTERPRO         | IPR003019: Metallothionein superfamily, eukaryotic                                                                         | MT1F, MT1X                        | 0,0145 |
|  | INTERPRO         | IPR023587: Metallothionein domain, vertebrate                                                                              | MT1F, MT1X                        | 0,0145 |
|  | GOTERM_MF_DIRECT | GO:0008270~zinc ion binding                                                                                                | EGR1, ENPEP, APOBEC3G, MT1F, MT1X | 0,0151 |
|  | UP_SEQ_FEATURE   | SITE: Interaction with DNA                                                                                                 | EGR1, APOBEC3G                    | 0,0152 |
|  | GOTERM_MF_DIRECT | GO:0001228~transcriptional activator activity, RNA polymerase II transcription regulatory region sequence-specific binding | EGR1, EGR3, FOSB, FOS             | 0,0155 |
|  | GOTERM_BP_DIRECT | GO:0015909~long-chain fatty acid transport                                                                                 | SLC27A6, PLIN2                    | 0,0155 |
|  | GOTERM_BP_DIRECT | GO:0010273~detoxification of copper ion                                                                                    | MT1F, MT1X                        | 0,0155 |
|  | UP_KW_LIGAND     | KW-0104~Cadmium                                                                                                            | MT1F, MT1X                        | 0,0158 |
|  | GOTERM_BP_DIRECT | GO:0051412~response to corticosterone                                                                                      | FOSB, FOS                         | 0,0174 |
|  | GOTERM_BP_DIRECT | GO:0045926~negative regulation of growth                                                                                   | MT1F, MT1X                        | 0,0174 |
|  | UP_KW_LIGAND     | KW-0480~Metal-thiolate cluster                                                                                             | MT1F, MT1X                        | 0,0205 |
|  | GOTERM_MF_DIRECT | GO:1990837~sequence-specific double-stranded DNA binding                                                                   | EGR1, EGR3, FOSB, FOS             | 0,0229 |



|                                                        |                                                                         |                                                                         |        |
|--------------------------------------------------------|-------------------------------------------------------------------------|-------------------------------------------------------------------------|--------|
| GOTERM_BP_DIRECT                                       | GO:0071294~cellular response to zinc ion                                | MT1F, MT1X                                                              | 0,0232 |
| UP_SEQ_FEATURE                                         | ACT_SITE: Proton donor                                                  | TKTL1, APOBEC3G, PDE4B                                                  | 0,0250 |
| GOTERM_BP_DIRECT                                       | GO:0071280~cellular response to copper ion                              | MT1F, MT1X                                                              | 0,0260 |
| GOTERM_BP_DIRECT                                       | GO:0009410~response to xenobiotic stimulus                              | FOSB, PLIN2, FOS                                                        | 0,0294 |
| GOTERM_MF_DIRECT                                       | GO:0003700~transcription factor activity, sequence-specific DNA binding | EGR1, EGR3, FOSB, FOS                                                   | 0,0295 |
| GOTERM_BP_DIRECT                                       | GO:0006882~cellular zinc ion homeostasis                                | MT1F, MT1X                                                              | 0,0346 |
| GOTERM_BP_DIRECT                                       | GO:0032570~response to progesterone                                     | FOSB, FOS                                                               | 0,0346 |
| GOTERM_BP_DIRECT                                       | GO:1901216~positive regulation of neuron death                          | EGR1, FOS                                                               | 0,0355 |
| GOTERM_BP_DIRECT                                       | GO:0051591~response to cAMP                                             | FOSB, FOS                                                               | 0,0393 |
| GOTERM_BP_DIRECT                                       | GO:0032870~cellular response to hormone stimulus                        | FOSB, FOS                                                               | 0,0412 |
| GOTERM_CC_DIRECT                                       | GO:0005634~nucleus                                                      | TKTL1, EGR1, EGR3, APOBEC3G, PDE4B, MT1F, FOSB, MT1X, PLIN2, FOS, DHRS2 | 0,0435 |
| GOTERM_BP_DIRECT                                       | GO:0035914~skeletal muscle cell differentiation                         | EGR1, FOS                                                               | 0,0459 |
| UP_SEQ_FEATURE                                         | DOMAIN: BZIP                                                            | FOSB, FOS                                                               | 0,0469 |
| <b>ENCODE_and_ChEA_Consensus_TFs_from_ChIP-X_table</b> |                                                                         |                                                                         |        |
| SRF ENCODE                                             |                                                                         | EGR1, EGR3, FOSB                                                        | 0,003  |
| <b>BioPlanet_2019_table</b>                            |                                                                         |                                                                         |        |
| BDNF signaling pathway                                 |                                                                         | EGR1, EGR3, PDE4B, FOSB                                                 | 0,0001 |
| Interleukin-5 regulation of apoptosis                  |                                                                         | EGR1, EGR3, PDE4B                                                       | 0,0004 |
| Regulation of NFAT transcription factors               |                                                                         | EGR1, EGR3                                                              | 0,0010 |
| AP-1 transcription factor network                      |                                                                         | EGR1, FOSB                                                              | 0,0022 |
| Differentiation pathway in PC12 cells                  |                                                                         | EGR1, EGR3                                                              | 0,0032 |
